# Supplementary material
Source: PubMed Central journal article supplement (PMC6556779)
Supplement: NIHMS1033074-supplement-Online_materials.pdf [file NIHMS1033074-supplement-Online_materials.pdf]

## Human Metabolic Phenotypes Diversity and its Association with Diet and Blood Pressure

Elaine Holmes<sup>1\*</sup>, Ruey Leng Loo<sup>1,2\*</sup>, Jeremiah Stamler<sup>3</sup>, Magda Bictash<sup>1,2</sup>, Ivan K. S. Yap<sup>1,2</sup>, Queenie Chan<sup>2</sup>, Tim Ebbels<sup>1</sup>, Maria De Iorio<sup>2</sup>, Ian J. Brown<sup>2</sup>, Kirill A. Veselkov<sup>1</sup>, Martha L. Daviglus<sup>3</sup>, Hugo Kesteloot<sup>4</sup>, Hirotsugu Ueshima<sup>5</sup>, Lian Zhao<sup>6</sup>, Jeremy K. Nicholson<sup>1</sup> and Paul Elliott<sup>2</sup>

<sup>1</sup>Biomolecular Medicine, Division of Surgery, Oncology, Reproductive Biology and Anaesthetics (SORA), Faculty of Medicine, Imperial College London, South Kensington Campus, London SW7 2AZ, UK

<sup>2</sup>Department of Epidemiology and Public Health, Imperial College London, St Mary's Campus, London, W2 1PG, UK

<sup>3</sup>Department of Preventive Medicine, Feinberg School of Medicine, Northwestern University, Chicago, IL, 60611, USA

<sup>4</sup>Department of Public Health, Division of Epidemiology, Akademisch Ziekenhuis St Rafael, Leuven B-3000, Belgium

<sup>5</sup>Department of Health Science, Shiga University of Medical Science, Otsu, Shiga 520-2192, Japan

<sup>6</sup> Department of Epidemiology, Fu Wai Hospital and Cardiovascular Institute, Chinese Academy of Medical Sciences, Beijing 100037, PRC.

\*CONTRIBUTED EQUALLY TO THE WORK

Joint corresponding authors:

email: [j.nicholson@imperial.ac.uk](mailto:j.nicholson@imperial.ac.uk) and [p.elliott@imperial.ac.uk](mailto:p.elliott@imperial.ac.uk)

## Supplementary Information

### *INTERMAP exclusion criteria*

Of 4,895 individuals initially surveyed, 215 were excluded as follows: 110 persons who did not attend all 4 study visits, 7 individuals for whom the diet data were considered unreliable, 37 persons for whom the calorie intake from any 24-hour dietary recall was less than 500 kcal/d (2,100 kJ/d) or was greater than 5,000 kcal/d (21,000 kJ/d) for women or greater than 8,000 kcal/d (33,600 kJ/d) for men, 37 individuals for whom 2 complete urine samples were unavailable, and 24 persons with other data that were incomplete, missing, or indicating a protocol violation. Therefore, 4,680 participants (2,359 men and 2,321 women) were included in INTERMAP. One urine specimen was lost and the  $^1\text{H}$  NMR urinary spectra were unusable from one or both of the first and second urine specimens for 49 participants, leaving a total of 4,630 available for the metabonomic study (Supplementary Fig. 1a).

### *Sample Preparation for NMR spectroscopy*

Urine samples were allowed to thaw at room temperature and centrifuged at 3000 rpm for 5 minutes to remove any debris. An aliquot of urine (500  $\mu\text{L}$ ) was mixed with phosphate buffer solution (250  $\mu\text{L}$  of 0.2 M  $\text{Na}_2\text{HPO}_4/0.2\text{M}$   $\text{NaH}_2\text{PO}_4$ , pH  $7.4 \pm 0.5$ ) in an Eppendorf to minimise variations in chemical shift values in the acquired  $^1\text{H}$  NMR spectra due to pH differences. The resulting solution was left to stand for 10 min. The buffered urine samples were then centrifuged at 6-8000 rpm for 5 min to remove any particulates. Supernatant (750  $\mu\text{L}$ ) was removed to which sodium 3-trimethylsilyl-( $^2\text{H}_4$ )-1-propionate (TSP) in  $\text{D}_2\text{O}$  (75  $\mu\text{L}$ ) (final concentration 0.1 mg/mL) was added.  $\text{D}_2\text{O}$

provided a deuterium lock signal and TSP the chemical shift reference ( $\delta$  0.0). Each sample (825  $\mu$ L) was placed into a 96-well plate for analysis and the remaining sample refrozen. Samples were mixed and the 96-well plate was left to stand for 10 minutes before centrifuging at 4,000 rpm for 10 minutes thus removing any precipitate from the solution.

### *<sup>1</sup>H NMR spectroscopic analysis of urine samples and spectral quantification of selected metabolites*

Conventional <sup>1</sup>H NMR spectra of the urine samples were acquired using a Bruker (Bruker Biospin, Rheinstetten, Germany) Avance 600 spectrometer operating at 600.29 MHz in flow-injection mode. Samples were automatically delivered to the spectrometer using a Gilson 215 robot incorporated into the BEST (Bruker Efficient Sample Transfer) system. The 1D <sup>1</sup>H NMR spectra of urine were acquired using a standard one-dimensional pulse sequence with water pre-saturation (NOSEYPR1D, recycle delay-90°- $t_1$ -90°- $t_m$ -90°-acquisition; XWIN-NMR 3.5) during both the recycle delay (2 s) and mixing time ( $t_m$ , 150 ms). The 90° pulse length was adjusted to approximately 10  $\mu$ s and  $t_1$  was set to 3  $\mu$ s, providing an acquisition time of 2.73 s and a total pulse repetition time of 4.88 s. For each sample, 64 free induction decays (FIDs) were collected into 32K data points using a spectral width of 20 ppm. The FIDs were multiplied by an exponential weighting function corresponding to a line broadening of 0.3 Hz and data were zero-filled to 64K data points prior to Fourier Transformation (FT). Four metabolites (alanine,  $\delta$  1.48; formate,  $\delta$  8.45; hippurate,  $\delta$  7.87 and NMNA,  $\delta$  4.44) were quantified via integration of signals relative to the creatinine CH<sub>2</sub> signal ( $\delta$  4.06) using externally standardised values for creatinine measured using the Jaffé reaction<sup>1</sup>. Mean

$T_1$  values were measured for each analyte and appropriate relaxation saturation factors calculated and applied across the whole data set. Integrations were also corrected for the minor suppression of the creatinine  $\text{CH}_2$  signal resulting from keto-enol mediated partial deuteration (measured empirically from standard creatinine measurements in  $\text{D}_2\text{O}/\text{H}_2\text{O}$  solutions).

#### *Technical errors and reliability estimates of quantified metabolites*

Technical errors for the four quantified metabolites, alanine, formate, hippurate and *N*-methylnicotinate, estimated from 8% split specimens, ranged from 11-12% for *N*-methylnicotinate to 24-27% for hippurate (Supplementary Table 4). Reliability for mean of the two 24 h urinary excretion values, estimated as percentage of the theoretical univariate regression coefficient (**Methods**), was 78.0% for alanine, 70.2% formate, 67.3% hippurate, 72.0% *N*-methylnicotinate. Correlation analysis relating NMR and ion exchange chromatography data for alanine, and NMR and gas chromatography mass spectrometry data for hippurate, gave Spearman- $r_s$  correlation coefficients of 0.93 and 0.91 respectively (**Methods**).

#### *Descriptive characteristics of East Asian and western countries*

East Asian countries are characterized by low Keys dietary lipid score<sup>2, 3</sup>, high dietary salt, low dietary  $\text{K}^+$  and high dietary  $\text{Na}^+/\text{K}^+$  ratio (China particularly); high prevalence of smoking (for men), low average serum total, non-HDL and LDL cholesterol, high upward slope of BP with age, high prevalence rates of adverse BP levels in middle and older age (despite normal average body mass index)<sup>4</sup>; low CHD and high stroke death rates

(markedly reduced in Japan in recent decades)<sup>5</sup>. In contrast, the UK and USA (like other western countries) have high Keys dietary lipid score, high intakes of total, saturated and trans fats and cholesterol; high average body mass index, high serum total, non-HDL and LDL cholesterol; high CHD mortality rates (persisting in the recent data despite substantial declines) with relatively low stroke death rates<sup>5</sup>.

Data on serum cholesterol were obtained from the MONICA<sup>6</sup> and INTERLIPID/INTERMAP studies<sup>7</sup> (Supplementary Table 5). Data on mortality are published in Zhou *et al.*<sup>6</sup> and Rosamond *et al.*<sup>8</sup> (Supplementary Table 6). We used the extensive INTERMAP database to provide data on dietary intakes, 24 h urinary sodium and potassium excretion, and body mass index for China, Japan, UK and USA (Supplementary Figs. 8 and 9).

#### *Definitions of multivariate model statistics $R^2$ and $Q^2$*

$R^2$  is defined as the proportion of variance in the data explained by the model.  $Q^2$  is defined as the proportion of variance in the data predictable by the model under cross validation. These quantities are derived in more detail below.

Each O-PLS-DA model regresses a set of X data (NMR spectra) against a response variable Y (dummy class matrix). For each model, the Residual Error Sum of Squares in the X space can be calculated as

$$RESS_X = \sum_i \|\hat{\mathbf{x}}_i - \mathbf{x}_i\|^2$$

where  $\hat{\mathbf{x}}_i$  denotes the spectrum predicted by the model for sample  $i$ . The proportion of explained variance in the X space,  $R^2$ , is then calculated as

$$R_X^2 = 1 - \frac{RESS_X}{SS_X}$$

where  $SS_X$  is the total sum of squares of the centred X data,  $SS_X = \sum_i \|\mathbf{x}_i - \bar{\mathbf{x}}\|^2$ . An

analogous quantity  $R_Y^2$  can be calculated for the response Y

$$RESS_Y = \sum_i \|\hat{y}_i - y_i\|^2, \quad R_Y^2 = 1 - \frac{RESS_Y}{SS_Y}.$$

When cross-validation is used to estimate the predictive quality of the model, each spectrum or response may be predicted from the model built when it is left out, denoted by  $\tilde{\mathbf{x}}$  and  $\tilde{y}$ . Similar quantities as above may be calculated to estimate proportion of variance predictable in cross-validation,  $Q^2$ , based on the Predicted Residual Error Sum of Squares (*PRESS*)

$$PRESS_X = \sum_i \|\tilde{\mathbf{x}}_i - \mathbf{x}_i\|^2, \quad Q_X^2 = 1 - \frac{PRESS_X}{SS_X},$$

and

$$PRESS_Y = \sum_i \|\tilde{y}_i - y_i\|^2, \quad Q_Y^2 = 1 - \frac{PRESS_Y}{SS_Y}.$$

$Q^2$  is therefore a measure of the robustness of a model to sub-sampling of the data and was used to choose the number of components for each model. For further information see Eriksson *et al.*<sup>8</sup>

## References

1. Jaffé, M. Über den Niederschlag welchen Pikrinsaure in normalen Harn erzeugt und über eine neue Reaction des Kreatinins. *Z. Physiol. Chem.* **10**,391-400 (1886).
2. Keys, A. & Parlin, R.W. Serum cholesterol response to changes in dietary lipids. *Am. J. Clin. Nutr.* **19**, 175-81 (1966).
3. Stamler, J.S. Population studies. In: Levy, R.I., Rifkind, B.M., Dennis, B.H., Ernst, N.D., eds. *Nutrition, lipids, and coronary heart diseases*. New York, NY: Raven Press, 25-88 (1979).
4. Intersalt Co-operative Research Group. Intersalt: an international study of electrolyte excretion and blood pressure. Results for 24 hour urinary sodium and potassium excretion. *Br. Med. J.* **297**, 319-28 (1988).
5. Levi, F., Lucchini, F., Negri, E. & La Vecchia, C. Trends in mortality from cardiovascular and cerebrovascular diseases in Europe and other areas of the world. *Heart* **88**, 119-124 (2002).
6. Zhou, B. F. *et al.* Nutrient intakes of middle-aged men and women in China, Japan, United Kingdom, and United States in the late 1990s: The INTERMAP Study. *J. Hum. Hypertens.* **17**, 623-630 (2003).
7. Okuda, N. *et al.* Relation of long chain n-3 polyunsaturated fatty acid intake to serum high density lipoprotein cholesterol among Japanese men in Japan and Japanese-American men in Hawaii: The INTERLIPID Study. *Atherosclerosis.* **178**, 371-379 (2005).
8. Rosamond, W. *et al.* Heart disease and stroke statistics – 2007 update: A report from the American Heart Association Statistics Committee and Stroke Statistics Subcommittee. *Circulation* **115**, e69-e171 (2007).

9. Eriksson, L., Johansson, E., Kettaneh-Wold, N. and Wold, S. (2001) *Multi- and Megavariate Data Analysis*. Umetrics AB, Umea, Sweden.



## Supplementary Tables and Figures

**Supplementary Table 1** Discriminatory metabolites<sup>†</sup> from population pairwise comparisons, first and second urine specimens  
a regression coefficients ( $r^2$ ) for each pairwise OPLS-DA comparison

| Metabolites                       | OPLS-DA of pairwise population comparisons |             |             |             |             |             |             |             |             |             |             |             |             |
|-----------------------------------|--------------------------------------------|-------------|-------------|-------------|-------------|-------------|-------------|-------------|-------------|-------------|-------------|-------------|-------------|
|                                   | Specimen                                   | Ch/Jp       |             | Ch/UK       |             | Ch/US       |             | Jp/UK       |             | Jp/US       |             | Jp/Jp-A     |             |
|                                   |                                            | 1           | 2           | 1           | 2           | 1           | 2           | 1           | 2           | 1           | 2           | 1           | 2           |
| 2-aminoisobutyric acid            |                                            |             | <b>0.28</b> | <b>0.26</b> | <b>0.26</b> | <b>0.23</b> | <b>0.17</b> | <b>0.19</b> |             |             |             |             |             |
| 2-hydroxyibuprofen                |                                            |             |             |             |             |             |             |             |             | <i>0.09</i> | <i>0.10</i> |             |             |
| 2-oxoglutarate                    |                                            |             | <b>0.30</b> | <b>0.34</b> | <b>0.28</b> | <b>0.32</b> |             |             |             |             |             |             |             |
| 3-hydroxyisovalerate              |                                            |             | <b>0.22</b> | <b>0.30</b> |             |             |             |             |             |             |             |             |             |
| Acetylcarnitine                   | <i>0.40</i>                                | <i>0.41</i> | <i>0.36</i> | <i>0.38</i> | <i>0.15</i> | <i>0.15</i> |             |             |             |             |             |             |             |
| Alanine                           |                                            |             | <b>0.27</b> | <b>0.32</b> | <b>0.21</b> | <b>0.28</b> | <b>0.17</b> | <b>0.14</b> |             |             |             |             |             |
| Citrate                           | <i>0.18</i>                                | <i>0.20</i> | <i>0.38</i> | <i>0.32</i> | <i>0.17</i> | <i>0.16</i> |             |             |             | <i>0.09</i> | <i>0.09</i> |             |             |
| Creatine                          | <i>0.33</i>                                | <i>0.37</i> |             |             | <i>0.14</i> | <i>0.17</i> | <b>0.18</b> | <b>0.13</b> |             |             |             |             |             |
| Ethanol                           |                                            |             |             |             |             |             | <b>0.15</b> | <b>0.13</b> | <b>0.20</b> | <b>0.16</b> | <b>0.17</b> | <b>0.13</b> |             |
| Ethylglucoside                    |                                            |             |             |             |             |             | <b>0.14</b> | <b>0.14</b> | <b>0.15</b> | <b>0.13</b> |             |             |             |
| Formate                           |                                            |             | <b>0.17</b> | <b>0.21</b> | <b>0.18</b> | <b>0.26</b> |             |             |             | <b>0.16</b> | <b>0.17</b> | <b>0.12</b> | <b>0.13</b> |
| Guanidinoacetate                  | <i>0.17</i>                                | <i>0.27</i> |             |             |             |             | <b>0.29</b> | <b>0.27</b> | <b>0.25</b> | <b>0.22</b> | <b>0.10</b> | <b>0.09</b> |             |
| Hippurate                         |                                            |             | <i>0.32</i> | <i>0.32</i> | <i>0.12</i> | <i>0.16</i> | <i>0.30</i> | <i>0.29</i> | <i>0.14</i> | <i>0.15</i> |             |             |             |
| Lysine                            | <i>0.27</i>                                | <i>0.23</i> |             |             |             |             |             |             | <b>0.19</b> | <b>0.19</b> |             |             |             |
| N-acetyl-glycoproteins            | <b>0.26</b>                                | <b>0.30</b> | <b>0.31</b> | <b>0.28</b> | <b>0.30</b> | <b>0.35</b> | <b>0.21</b> | <b>0.17</b> | <b>0.14</b> | <b>0.12</b> | <b>0.12</b> | <b>0.19</b> |             |
| N-methyl-2-pyridone-5 carboxamide |                                            |             | <i>0.29</i> | <i>0.25</i> |             |             |             |             |             |             | <i>0.20</i> | <i>0.18</i> |             |
| N-methylnicotinate                | <i>0.19</i>                                | <i>0.24</i> |             |             | <i>0.14</i> | <i>0.15</i> |             |             |             |             |             |             |             |
| NNN-trimethyllysine               |                                            |             |             |             |             |             | <b>0.18</b> | <b>0.16</b> | <b>0.18</b> | <b>0.15</b> |             |             |             |
| Phenylacetylglutamine             |                                            |             | <i>0.31</i> | <i>0.26</i> |             |             | <i>0.18</i> | <i>0.16</i> |             |             |             |             |             |
| Protein envelope (unresolved)‡    | <i>0.33</i>                                | <i>0.35</i> |             |             | <b>0.21</b> | <b>0.23</b> | <b>0.23</b> | <b>0.21</b> | <b>0.32</b> | <b>0.24</b> | <b>0.17</b> | <b>0.17</b> |             |
| Sarcosine                         | <b>0.22</b>                                | <b>0.35</b> | <b>0.24</b> | <b>0.32</b> | <b>0.31</b> | <b>0.40</b> |             |             |             |             |             |             |             |
| Suberate                          | <b>0.43</b>                                | <b>0.50</b> | <b>0.29</b> | <b>0.42</b> | <b>0.38</b> | <b>0.39</b> |             |             |             |             |             |             |             |
| Succinate                         |                                            |             | <i>0.29</i> | <i>0.30</i> | <i>0.12</i> | <i>0.11</i> | <i>0.21</i> | <i>0.17</i> |             |             |             |             |             |
| Taurine                           | <i>0.20</i>                                | <i>0.17</i> |             |             |             |             | <b>0.19</b> | <b>0.15</b> | <b>0.22</b> | <b>0.14</b> |             |             |             |
| Trimethylamine-N-oxide            | <i>0.29</i>                                | <i>0.31</i> |             |             |             |             | <b>0.22</b> | <b>0.18</b> | <b>0.21</b> | <b>0.22</b> | <b>0.09</b> | <b>0.11</b> |             |
| Unknown 1 ( $\delta$ 2.80,s)      | <b>0.23</b>                                | <b>0.32</b> | <b>0.24</b> | <b>0.30</b> | <b>0.24</b> | <b>0.27</b> |             |             |             |             |             |             |             |
| Unknown 2 ( $\delta$ 3.36,s)      |                                            |             | <i>0.30</i> | <i>0.29</i> |             |             |             |             |             |             |             |             |             |
| Unknown 3 ( $\delta$ 1.27)        |                                            |             |             |             |             |             | <i>0.26</i> | <i>0.25</i> |             |             |             |             |             |
| Unknown 4 ( $\delta$ 7.96, m)     |                                            |             | <i>0.27</i> | <i>0.30</i> | <i>0.14</i> | <i>0.15</i> |             |             |             |             |             |             |             |
| Unknown 5 ( $\delta$ 2.78,s)      | <b>0.24</b>                                | <b>0.34</b> | <b>0.33</b> | <b>0.28</b> | <b>0.31</b> | <b>0.35</b> |             |             |             |             |             |             |             |
| Q <sup>2</sup> Y (%)              | 83.5                                       | 86.1        | 84.5        | 85.8        | 82.8        | 82.1        | 77.2        | 77.9        | 77.5        | 79.4        | 68.4        | 75.3        |             |
| Number of orthogonal components   | 3                                          | 3           | 2           | 2           | 4           | 3           | 3           | 4           | 4           | 4           | 3           | 4           |             |

† see Methods

Abbreviations: Ch, China; Jp, Japan; UK, United Kingdom; US, United States of America; Jp-A, Japanese Americans;  $\delta$ , proton chemical shift; s, singlet

Values in bold denote metabolites higher in concentration in the first population of the pairwise OPLS-DA analyses.

Values in italics denote metabolites higher in concentration in the second population of the pairwise OPLS-DA analyses.

‡ protein envelope is overlapped with superimposed signals from isoleucine, leucine, valine

**b**  $^1\text{H}$  NMR spectral parameters (chemical shift and peak appearance) for discriminatory metabolites from pairwise population sample comparisons

| NMR Spectroscopic Data                     |                                   |                                                                              |
|--------------------------------------------|-----------------------------------|------------------------------------------------------------------------------|
| Urinary Metabolites                        | Moieties                          | Signal directly observed, $\delta$ <sup>¥</sup>                              |
| 2-aminoisobutyric acid                     | CH; CH <sub>2</sub>               | 1.20 (d); <b>2.61(m)</b> ; <b>3.11(m)</b>                                    |
| 2-hydroxyibuprofen                         | CH <sub>3</sub>                   | <b>1.12(s)</b> ; 1.52(d); 2.78(s); 3.56(t); 3.83(q); 3.98(q); 7.22-7.37(m)   |
| 2-oxoglutarate                             | CH <sub>2</sub>                   | <b>2.45(t)</b> , 3.00(t)                                                     |
| 3-hydroxyisovalerate                       | CH <sub>3</sub>                   | <b>1.27(s)</b> ; 2.37(s)                                                     |
| Acetylcarnitine                            | CH <sub>3</sub>                   | 2.17 (s); 2.52(dd); 2.65 (dd); <b>3.21(s)</b> ; 3.61 (d); 3.85(dd)           |
| Alanine                                    | CH <sub>3</sub>                   | <b>1.48 (d)</b> ; 3.79 (qt)                                                  |
| Citrate                                    | CH <sub>2</sub>                   | <b>2.54(d)</b> ; <b>2.66(d)</b> ;                                            |
| Creatine                                   | CH <sub>2</sub>                   | 3.04(s); <b>3.94(s)</b>                                                      |
| Ethanol                                    | CH <sub>2</sub> ; CH <sub>3</sub> | <b>1.2(t)</b> ; <b>3.65(q)</b>                                               |
| Ethylglucoside                             | CH <sub>3</sub>                   | <b>1.24(t)</b> ;3.41(dd);3.55(dd);3.69(m);3.71(dd);3.77(dd);3.80(q);3.86(dd) |
| Formate                                    | CH                                | <b>8.46(s)</b>                                                               |
| Guanidinoacetate                           | CH <sub>2</sub>                   | <b>3.80(s)</b>                                                               |
| Hippurate                                  | CH <sub>2</sub> ; CH; CH; CH      | <b>3.97 (d)</b> ; <b>7.55 (t)</b> ; <b>7.64 (t)</b> ; <b>7.84(d)</b>         |
| Lysine                                     | CH <sub>2</sub> ;CH <sub>2</sub>  | 1.47(m); 1.72 (m); <b>1.89 (m)</b> ; <b>3.01 (t)</b> ; 3.77(t)               |
| <i>N</i> -acetyl-glycoproteins             | CH <sub>3</sub>                   | <b>1.98 - 2.06</b>                                                           |
| <i>N</i> -methyl-2-pyridone-5 carboxamide  | CH; CH                            | <b>8.34(m)</b>                                                               |
| <i>N</i> -methylnicotinate                 | CH <sub>3</sub> ;CH; CH;CH        | <b>4.44(s)</b> ; <b>8.08(t)</b> ; <b>8.84(t)</b> ; <b>9.13(s)</b>            |
| <i>NNN</i> -trimethyllysine                | N-(CH <sub>3</sub> )              | <b>3.12(s)</b> ; 3.35(m); 3.76(m)                                            |
| Phenylacetylglutamine                      | CH; CH                            | <b>1.98 (m)</b> ; 2.13 (m); 4.20(m); <b>7.37(t)</b> ; <b>7.43(t)</b>         |
| Protein envelope (unresolved) <sup>‡</sup> | -                                 | <b>0.90 - 0.98</b>                                                           |
| Sarcosine                                  | CH <sub>3</sub>                   | <b>2.75 (s)</b>                                                              |
| Suberate                                   | CH <sub>2</sub>                   | <b>1.31(m)</b> ; <b>1.55(m)</b> ; <b>2.18(t)</b>                             |
| Succinate                                  | CH <sub>3</sub>                   | <b>2.41(s)</b>                                                               |
| Taurine                                    | CH <sub>2</sub>                   | 3.26 (t); <b>3.43(t)</b>                                                     |
| Trimethylamine- <i>N</i> -oxide            | N-(CH <sub>3</sub> ) <sub>3</sub> | <b>3.27 (s)</b>                                                              |
| Unknown 1                                  | -                                 | <b>2.80 (s)</b>                                                              |
| Unknown 2                                  | -                                 | <b>3.36(s)</b>                                                               |
| Unknown 3                                  | -                                 | <b>1.27</b>                                                                  |
| Unknown 4                                  | -                                 | <b>7.96 (m)</b>                                                              |
| Unknown 5                                  | CH <sub>3</sub>                   | <b>2.78 (s)</b>                                                              |

¥ chemical shifts in bold indicated signals found to be significantly different in the OPLS-DA pairwise comparisons (Suppl Fig. 1A) and those not in bold were directly observed in 1D  $^1\text{H}$ -NMR and their connectivities confirmed by statistical total correlation spectroscopy (STOCSY)

‡ protein envelope is overlapped with superimposed signals from isoleucine, leucine, valine

**Supplementary Table 2** Partial Pearson-r correlation coefficients for quantified urinary metabolites (mmol/24 h)\* with dietary and urinary variables, and body mass index, adjusted for age, gender, and sample

| Variable                              | Metabolite            |                       |                         |                                  |
|---------------------------------------|-----------------------|-----------------------|-------------------------|----------------------------------|
|                                       | Alanine<br>(n= 4,232) | Formate<br>(n= 4,147) | Hippurate<br>(n= 4,184) | N-methylnicotinate<br>(n= 4,081) |
| Energy (kcal/24 hr)                   | 0.17                  | 0.14                  | 0.03                    | 0.05                             |
| Total protein (%kcal)                 | 0.07                  | 0.06                  | 0.05                    | 0.02                             |
| Animal protein (%kcal)                | 0.07                  | 0.03                  | 0.00                    | -0.02                            |
| Vegetable protein (%kcal)             | -0.01                 | 0.03                  | 0.07                    | 0.06                             |
| Total fat (%kcal)                     | 0.09                  | 0.03                  | -0.03                   | 0.04                             |
| Monounsaturated fatty acids (%kcal)   | 0.08                  | 0.02                  | -0.04                   | 0.02                             |
| Polyunsaturated fatty acids (%kcal)   | 0.06                  | 0.01                  | -0.02                   | -0.01                            |
| Saturated fatty acids (%kcal)         | 0.06                  | 0.04                  | -0.02                   | 0.07                             |
| Total available carbohydrate (%kcal)  | -0.02                 | -0.01                 | 0.07                    | -0.06                            |
| Starch (%kcal)                        | 0.03                  | 0.01                  | 0.01                    | -0.01                            |
| Estimated total sugars (%kcal)        | -0.06                 | -0.02                 | 0.08                    | -0.06                            |
| Trans fatty acids (%kcal)             | 0.04                  | 0.00                  | -0.04                   | 0.00                             |
| Omega 3 fatty acids (%kcal)           | 0.04                  | 0.00                  | 0.00                    | -0.03                            |
| Omega 6 fatty acids (%kcal)           | 0.06                  | 0.01                  | -0.02                   | 0.00                             |
| Alcohol (%kcal)                       | -0.11                 | -0.06                 | -0.10                   | 0.02                             |
| Cholesterol (mg/1,000kcal)            | 0.11                  | 0.04                  | -0.03                   | 0.00                             |
| Fibre (g/1,000kcal)                   | -0.05                 | 0.05                  | 0.17                    | 0.08                             |
| Calcium (mg/1,000kcal)                | -0.01                 | 0.05                  | 0.09                    | 0.05                             |
| Magnesium (mg/1,000kcal)              | -0.05                 | 0.09                  | 0.19                    | 0.18                             |
| Phosphorus (mg/1,000kcal)             | 0.03                  | 0.07                  | 0.11                    | 0.04                             |
| Urinary sodium (mmol/24 hr)           | 0.39                  | 0.37                  | 0.11                    | 0.10                             |
| Urinary potassium (mmol/24 hr)        | 0.21                  | 0.32                  | 0.40                    | 0.29                             |
| Urinary sodium to potassium ratio     | 0.13                  | 0.05                  | -0.22                   | -0.13                            |
| Body mass index (kg/m <sup>2</sup> )  | 0.28                  | 0.03                  | -0.05                   | -0.04                            |
| Keys dietary lipid score <sup>†</sup> | 0.08                  | 0.04                  | -0.03                   | 0.05                             |

\* Dietary data are from mean of four 24 h recalls. Urinary data are from mean of two 24 h urine collections. Body mass index is calculated from mean of two measurements of height and weight.

<sup>†</sup>Keys score:  $1.35 \times (2 \times \text{SFA} - \text{PFA}) + 1.5 \sqrt{\text{Chol}}$  where SFA = saturated fatty acids (%kcal), PFA = polyunsaturated fatty acids (%kcal) and chol = cholesterol (mg/1,000kcal).  $|r| > 0.06$ ,  $P < 0.001$

**Supplementary Table 3** Estimated mean differences\* in systolic and diastolic BP  
(Z-scores<sup>‡</sup>), non-intervened persons<sup>§</sup>

|                               | A                                 |          |                               |          | B                                 |          |                               |          |
|-------------------------------|-----------------------------------|----------|-------------------------------|----------|-----------------------------------|----------|-------------------------------|----------|
|                               | Not adjusted for BMI <sup>†</sup> |          | Adjusted for BMI <sup>†</sup> |          | Not adjusted for BMI <sup>†</sup> |          | Adjusted for BMI <sup>†</sup> |          |
| <i>Systolic BP</i>            |                                   |          |                               |          |                                   |          |                               |          |
| Alanine (n= 2,018)            | 2.83                              | (4.27)   | 0.62                          | (0.94)   | 3.48                              | (4.84)   | 1.86                          | (2.63)   |
| Formate (n= 1,976)            | -1.22                             | (-1.97)  | -1.39                         | (-2.34)  | -1.78                             | (-2.59)  | -0.83                         | (-1.25)  |
| Hippurate (n= 1,936)          | -2.09                             | #(-3.17) | -1.81                         | #(-2.85) | -1.21                             | #(-1.68) | -0.48                         | #(-0.70) |
| N-methylnicotinate (n= 1,876) | 0.68                              | (1.08)   | 0.83                          | (1.37)   | 1.01                              | (1.54)   | 1.44                          | (2.28)   |
| <i>Diastolic BP</i>           |                                   |          |                               |          |                                   |          |                               |          |
| Alanine (n= 2,018)            | 1.97                              | (4.30)   | 0.40                          | (0.87)   | 2.18                              | (4.35)   | 1.00                          | (2.03)   |
| Formate (n= 1,976)            | -0.89                             | (-2.10)  | -0.98                         | (-2.44)  | -1.50                             | (-3.19)  | -0.85                         | (-1.88)  |
| Hippurate (n= 1,936)          | -1.01                             | (-2.23)  | -0.84                         | (-1.91)  | -0.76                             | (-1.53)  | -0.29                         | (-0.61)  |
| N-methylnicotinate (n= 1,876) | 0.21                              | (0.47)   | 0.32                          | (0.73)   | 0.29                              | (0.61)   | 0.60                          | (1.30)   |

\*Systolic and diastolic BP differences (mm Hg) per +2 standard deviation difference in each of four quantified urinary metabolites (mean of two 24 h urine values). Two standard deviation difference – based on total population with valid quantified urinary metabolite data (see Table 1 and Suppl. Fig. 1b) – for alanine = 0.34 mmol/24 h; formate = 0.29 mmol/24 h; hippurate = 3.55 mmol/24 h; N-methylnicotinate = 0.41 mmol/24 h. (Chemical shifts used for quantification: alanine,  $\delta$ 1.48; formate,  $\delta$ 8.45; hippurate,  $\delta$ 7.85 and N-methylnicotinate,  $\delta$ 4.44.) Regression coefficients for individuals are pooled across countries (**Methods**).

A: adjusted for age, sex, sample, physical activity (h/24 h moderate or heavy activity), family history of high blood pressure

B: A + 7-day alcohol (g/24 h) + urinary Na<sup>+</sup> (mmol/24 h) + urinary K<sup>+</sup> excretion (mmol/24 h)

<sup>‡</sup> Z score: regression coefficient divided by standard error. Z-score  $\geq 1.96$ , P<0.05;  $\geq 2.58$ , P<0.01;  $\geq 3.29$ , P<0.001;  $\geq 3.89$ , P<0.0001.

<sup>§</sup> Non-intervened: people without special diet/nutritional supplements or diagnosis/treatment for cardiovascular disease or diabetes

<sup>#</sup> P for cross-country heterogeneity <0.05. Country-specific BP differences were inverse in Japan, China, and UK (systolic BP differences per +2 standard deviation difference in hippurate -2.16 to -4.79 mm Hg, Z-scores -1.36 to -3.15), direct in the USA (systolic BP differences +0.26 to +1.58 mm Hg, Z-scores +0.27 to +1.58).

<sup>†</sup> Body mass index, kg/m<sup>2</sup>

**Supplementary Table 4** Percent technical error\* from split urinary specimens for alanine, formate, hippurate and *N*-methylnicotinate (mmol/24 h) quantified by <sup>1</sup>H NMR

| Metabolite                 | First specimen |                          | Second specimen |                          |
|----------------------------|----------------|--------------------------|-----------------|--------------------------|
|                            | n <sup>†</sup> | Percent technical error* | n <sup>†</sup>  | Percent technical error* |
| Alanine                    | 308            | 17.3%                    | 296             | 15.5%                    |
| Formate                    | 293            | 11.9%                    | 282             | 24.8%                    |
| Hippurate                  | 292            | 24.0%                    | 287             | 26.7%                    |
| <i>N</i> -methylnicotinate | 289            | 11.7%                    | 273             | 10.7%                    |

\* Percent technical error: 100 times technical error divided by mean value of split samples; technical error =  $\Sigma d^2/2n^\dagger$ , where d is the difference between a pair of measurements.

<sup>†</sup> number of split pairs

**Supplementary Table 5** Serum total and LDL cholesterol, early 1990s (MONICA)\* and late 1990s (INTERLIPID/INTERMAP)†, men and women, by country

| Risk factor               | China | Japan | UK      |         | USA      |          |
|---------------------------|-------|-------|---------|---------|----------|----------|
|                           |       |       | Belfast | Glasgow | Stanford | Honolulu |
| <i>Men</i>                |       |       |         |         |          |          |
| Total cholesterol (mg/dl) |       |       |         |         |          |          |
| MONICA*                   | 174   | –     | 228     | 236     | 209      | –        |
| INTERLIPID/INTERMAP†      | –     | 198.6 | –       | –       | –        | 211.6    |
| LDL-cholesterol (mg/dl)   |       |       |         |         |          |          |
| INTERLIPID/INTERMAP†      | –     | 120.4 | –       | –       | –        | 137.9    |
| <i>Women</i>              |       |       |         |         |          |          |
| Total cholesterol (mg/dl) |       |       |         |         |          |          |
| MONICA*                   | 174   | –     | 228     | 236     | 205      | –        |
| INTERLIPID/INTERMAP†      | –     | 202.1 | –       | –       | –        | 210.2    |
| LDL-cholesterol (mg/dl)   |       |       |         |         |          |          |
| INTERLIPID/INTERMAP†      | –     | 123.7 | –       | –       | –        | 136.1    |

\* Zhou *et al.*<sup>6</sup>

† Okuda *et al.*<sup>7</sup>

MONICA: ages 35-64; INTERLIPID/INTERMAP: ages 40-59

**Supplementary Table 6** Age-standardised\* coronary heart disease and stroke mortality rates, 1970<sup>†</sup> and 1999/2004<sup>‡</sup>, men and women, ages 35-74 years by country

| Cause of death by gender, year | China |       | Japan | UK              |          | USA |
|--------------------------------|-------|-------|-------|-----------------|----------|-----|
|                                | Rural | Urban |       | England & Wales | Scotland |     |
| <i>Men</i>                     |       |       |       |                 |          |     |
| Coronary heart disease         |       |       |       |                 |          |     |
| 1970 <sup>†</sup>              | –     | –     | 94    | 509             | 634      | 652 |
| 1999/2004 <sup>‡</sup>         | 64    | 106   | 53    | 196             | 247      | 174 |
| Stroke                         |       |       |       |                 |          |     |
| 1970 <sup>†</sup>              | –     | –     | 385   | 141             | 180      | 120 |
| 1999/2004 <sup>‡</sup>         | 243   | 217   | 66    | 49              | 61       | 35  |
| <i>Women</i>                   |       |       |       |                 |          |     |
| Coronary heart disease         |       |       |       |                 |          |     |
| 1970 <sup>†</sup>              | –     | –     | 47    | 164             | 240      | 252 |
| 1999/2004 <sup>‡</sup>         | 41    | 71    | 16    | 68              | 98       | 73  |
| Stroke                         |       |       |       |                 |          |     |
| 1970 <sup>†</sup>              | –     | –     | 225   | 113             | 158      | 90  |
| 1999/2004 <sup>‡</sup>         | 152   | 147   | 31    | 36              | 48       | 27  |

\* Rate per 100,000 population adjusted to the standard European population

<sup>†</sup> Zhou *et al.*<sup>6</sup>

<sup>‡</sup> China 1999; Japan 2003; UK 2002; USA 2004 (Rosamond *et al.*<sup>8</sup>)

Mortality data not available for China in 1970

**Supplementary Figure 1** Schematic of data analyses

**a** Participant numbers, exclusions, pattern recognition techniques and identification of discriminatory metabolites



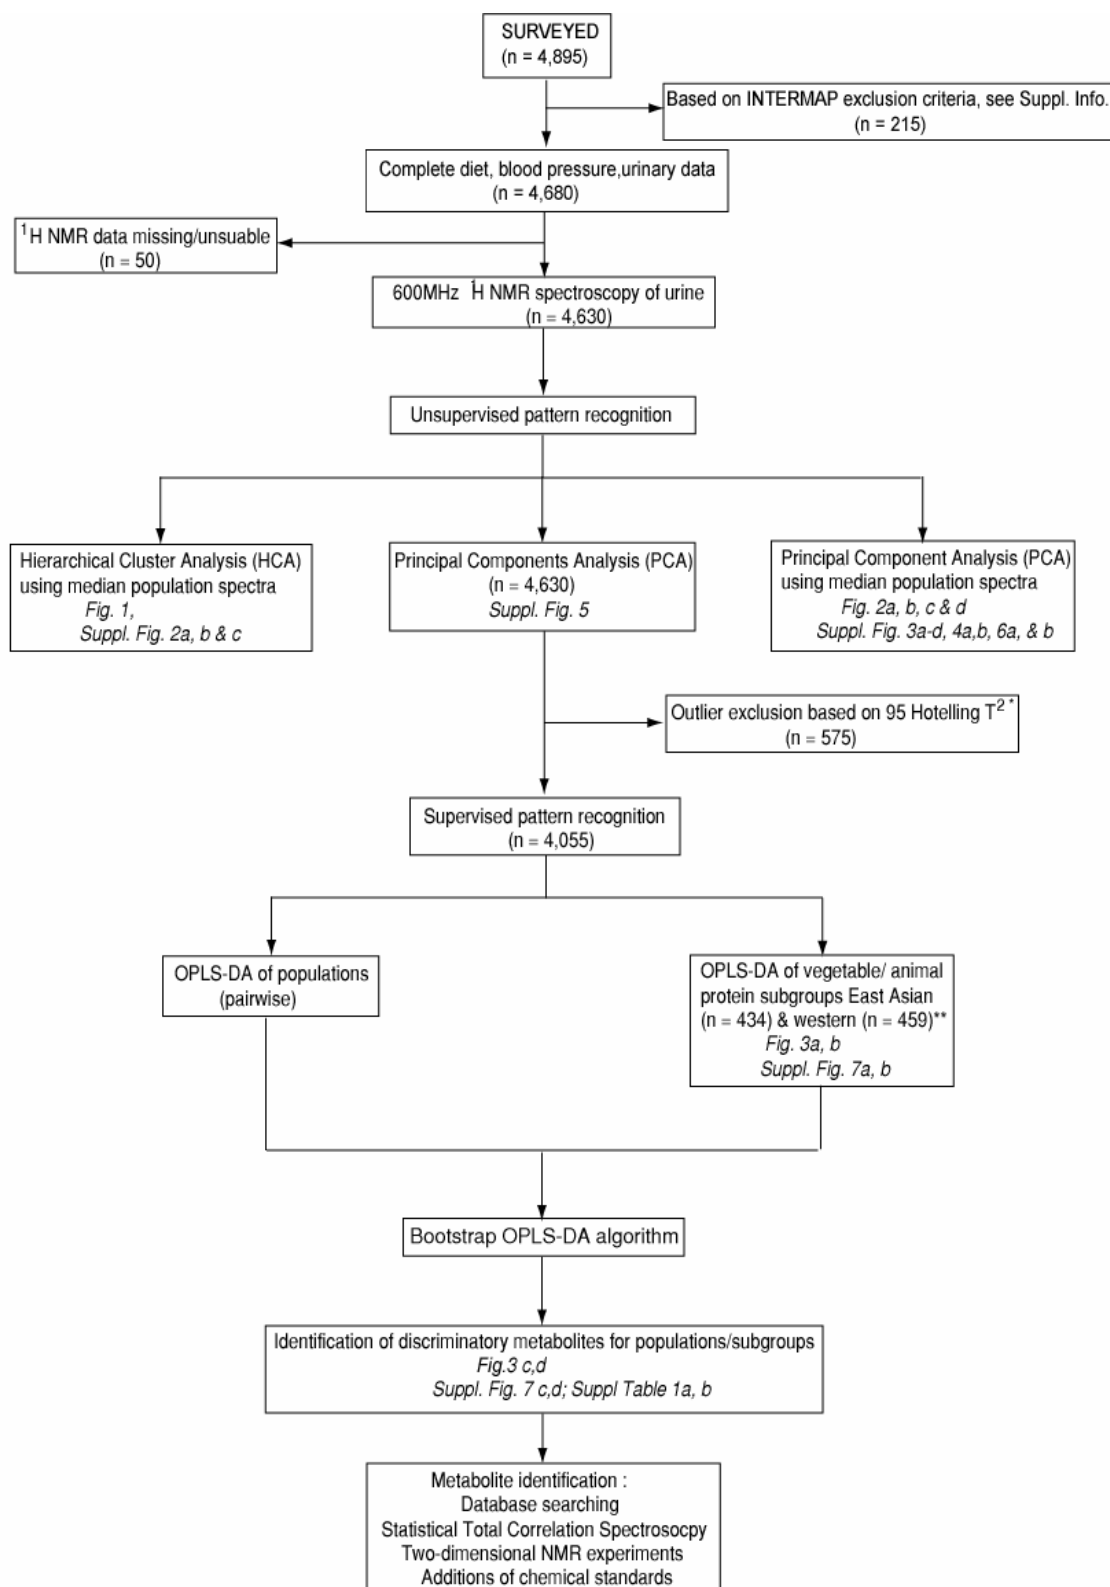

Key: \* Spectra data normalised to total area, excluded 575 urine samples containing high glucose, trimethylamine N-oxide, paracetamol and alcohol. All other models normalised to probabilistic quotient method

OPLS-DA = orthogonal partial least square -discriminant analysis

\*\* Sub-group analysis for high vegetable/low animal protein vs low vegetable/high animal protein for East Asian and Western populations

## b Numbers included for multiple regression of four quantified metabolites

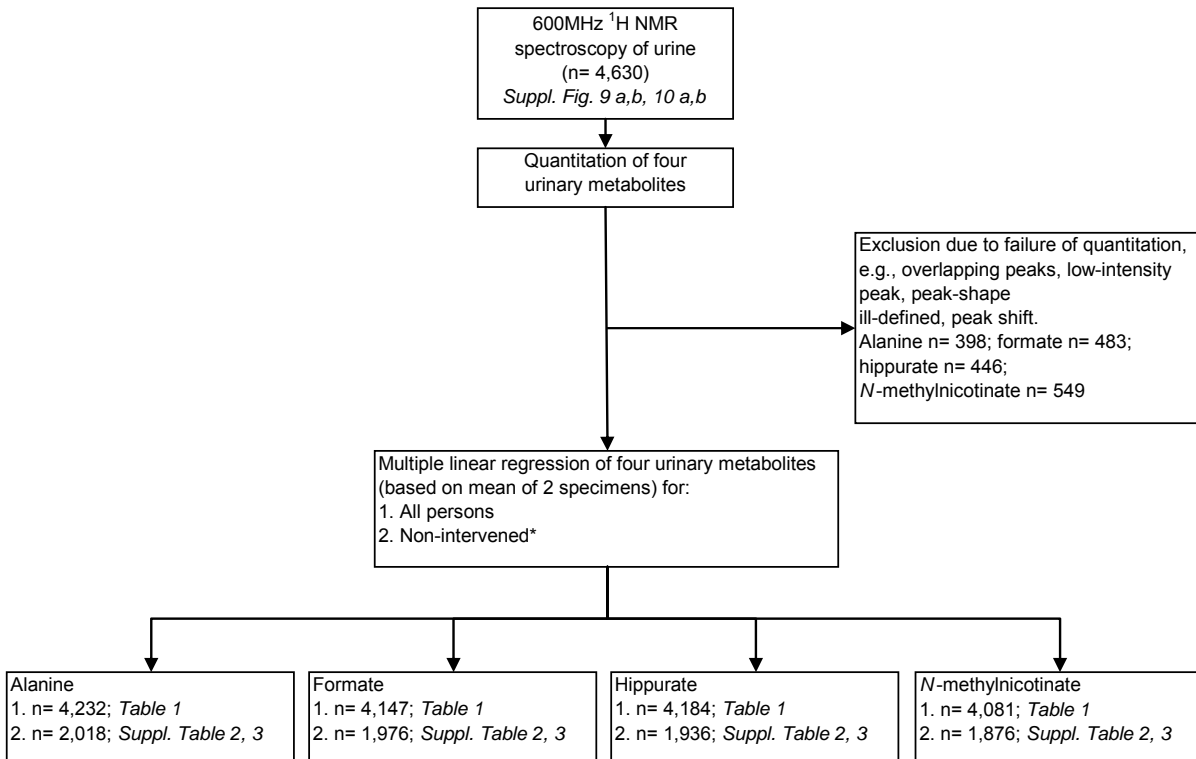

\*Non-intervened: people without special diet/nutritional supplements or diagnosis/treatment for cardiovascular disease or diabetes

**Supplementary Figure 2** Hierarchical cluster analysis (HCA) based on median  $^1\text{H}$  NMR urine spectra by population sample and gender (n= 4,630)

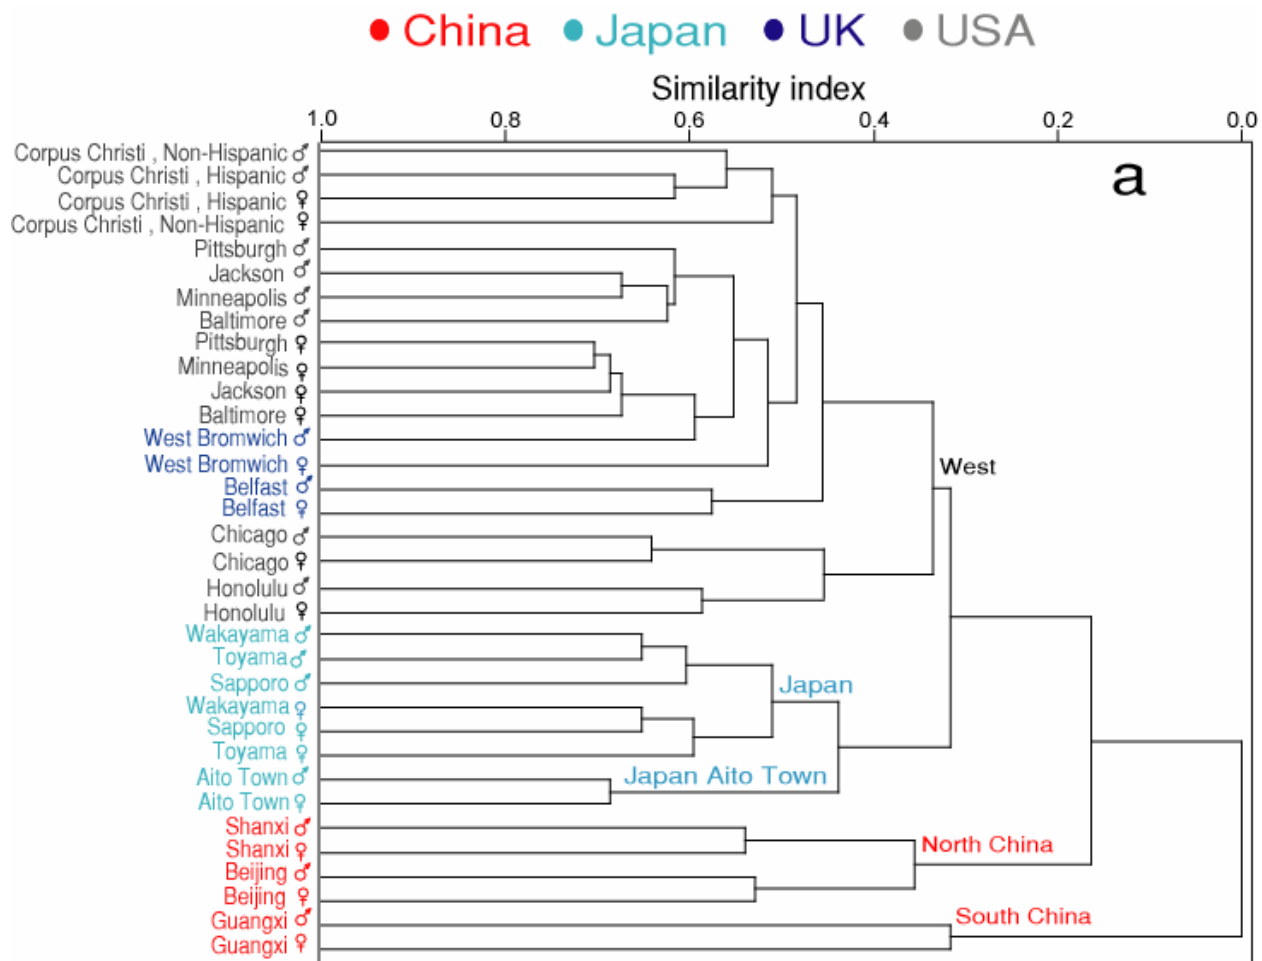

a group average linkage method, second urine specimens

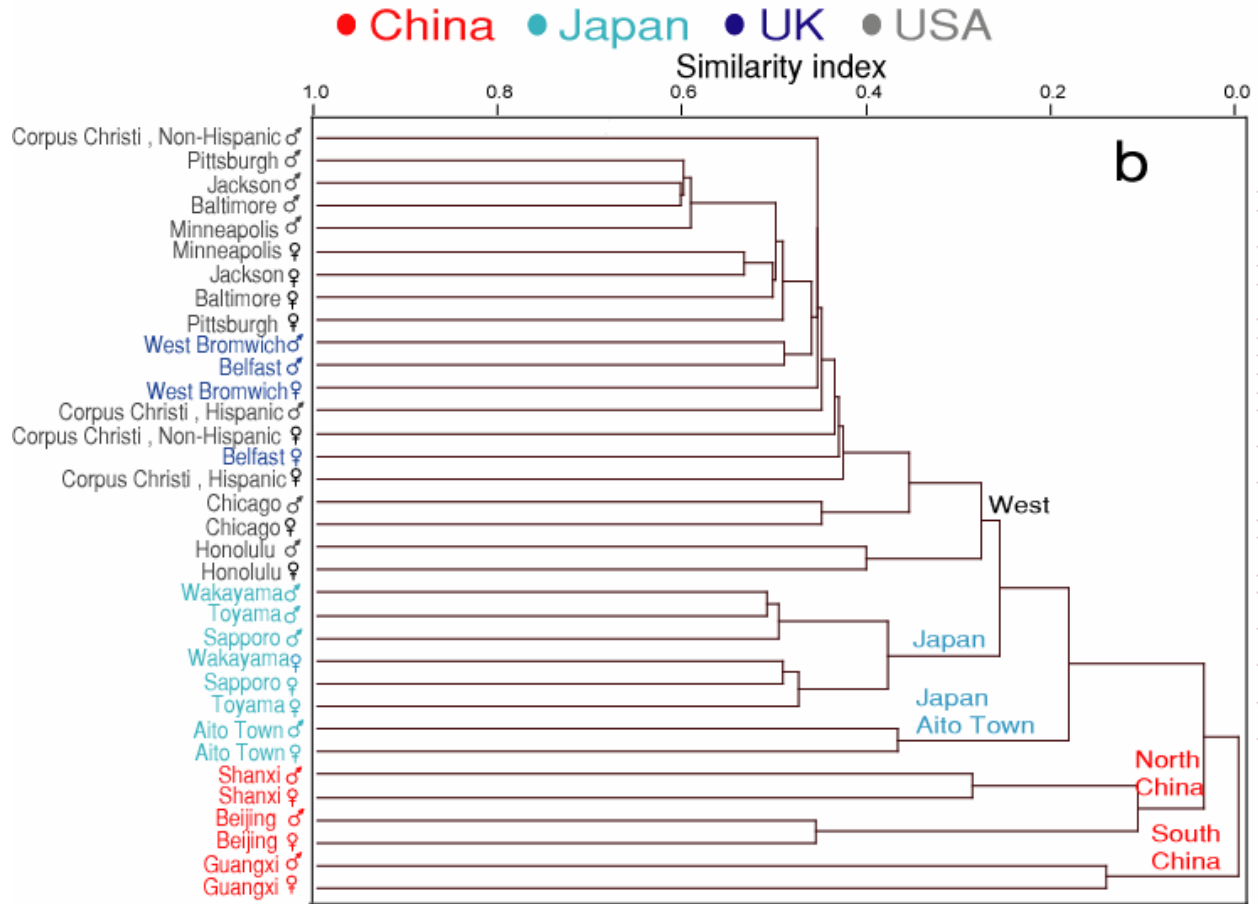

**b** single linkage method, first urine specimens

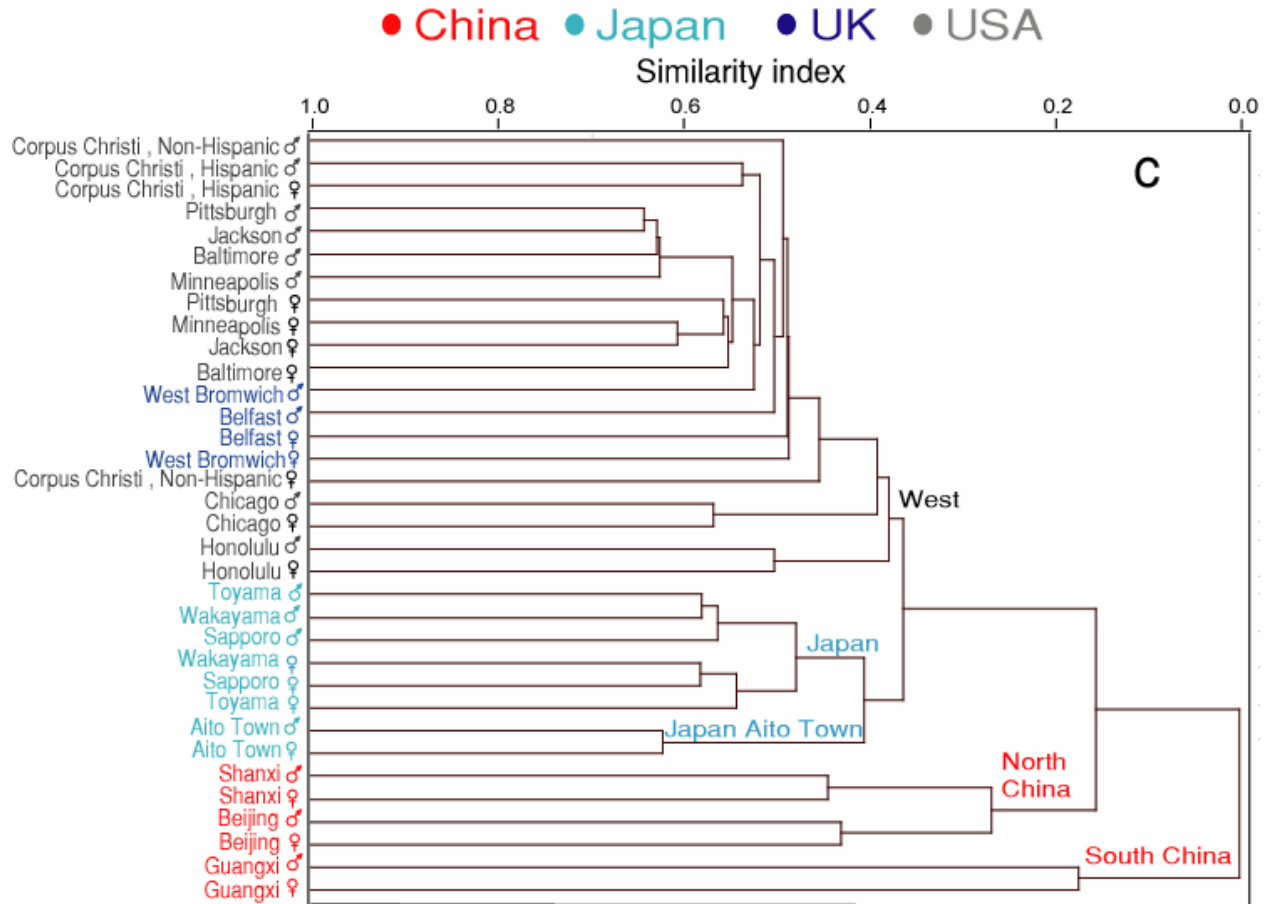

**c** single linkage method, second urine specimens

The similarity index measures the multivariate distance between clusters. A similarity of one indicates zero distance between clusters; a value of zero indicates the maximum intercluster separation seen in the data.

**Supplementary Figure 3** Cross validated Principal Components Analysis (PCA) scores plots based on a 7 component model (n= 4,630)

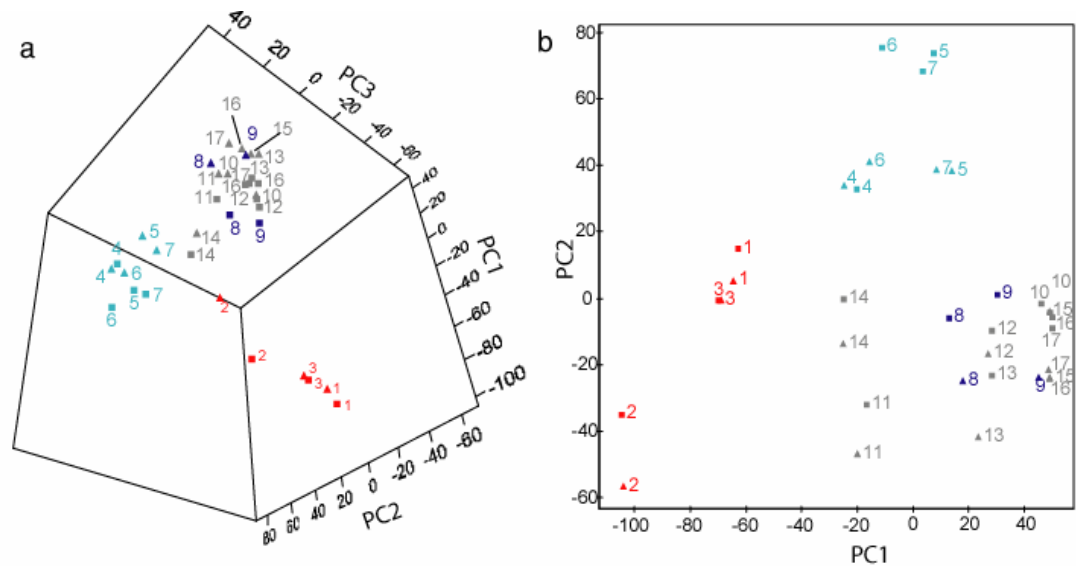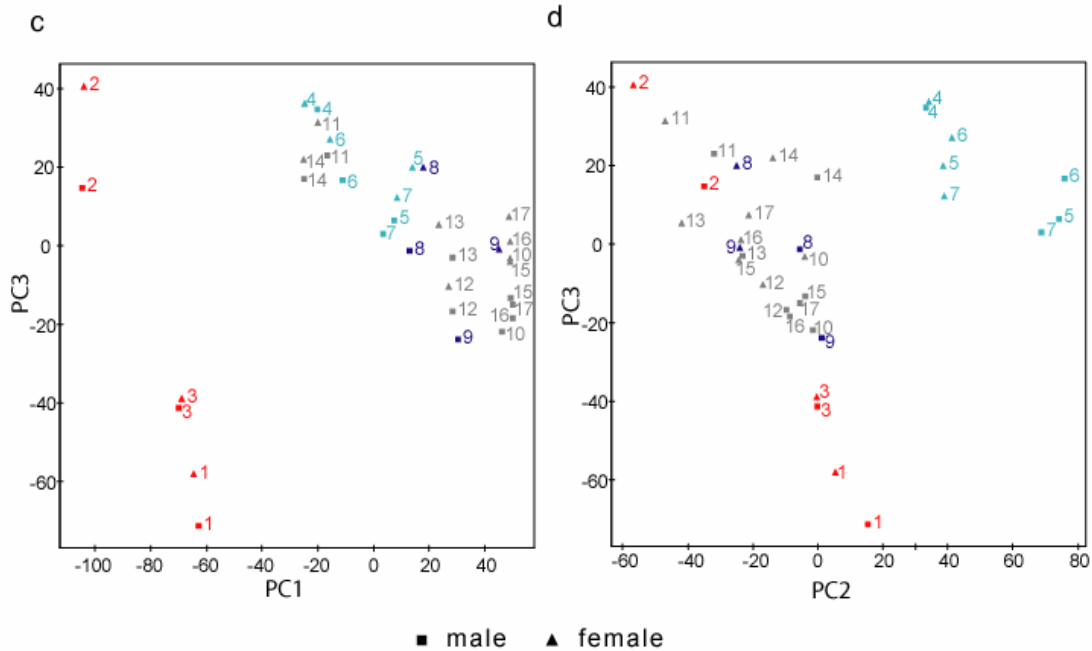

Key: 1, Beijing; 2, Guangxi; 3, Shanxi; 4, Aito Town; 5, Sapporo; 6, Toyama; 7, Wakayama; 8, Belfast; 9, West Bromwich; 10, Baltimore; 11, Chicago; 12, Corpus Christi Hispanic; 13, Corpus Christi non-Hispanic; 14, Honolulu; 15, Jackson; 16, Minneapolis; 17, Pittsburgh

**a** 3-dimensional plot for Principal Components (PC) 1-3; **b** PC2 vs PC1; **c** PC3 vs PC1;  
**d** PC3 vs PC2

Median  $^1\text{H}$  NMR spectra of the second 24 h urine specimen stratified by country and by gender; female ( $\blacktriangle$ ) and male ( $\blacksquare$ ),  $R^2_X = 74.9\%$  (percent variation in the NMR data explained by the model);  $Q^2_X = 52.1\%$  (percent variation in the NMR data predictable by the model from cross validation). Data for the first three components available in an Excel file in **Supplementary Information**.

**Supplementary Figure 4** Cross validated Principal Components Analysis (PCA) scores plots based on median  $^1\text{H}$  NMR urine spectra stratified by country

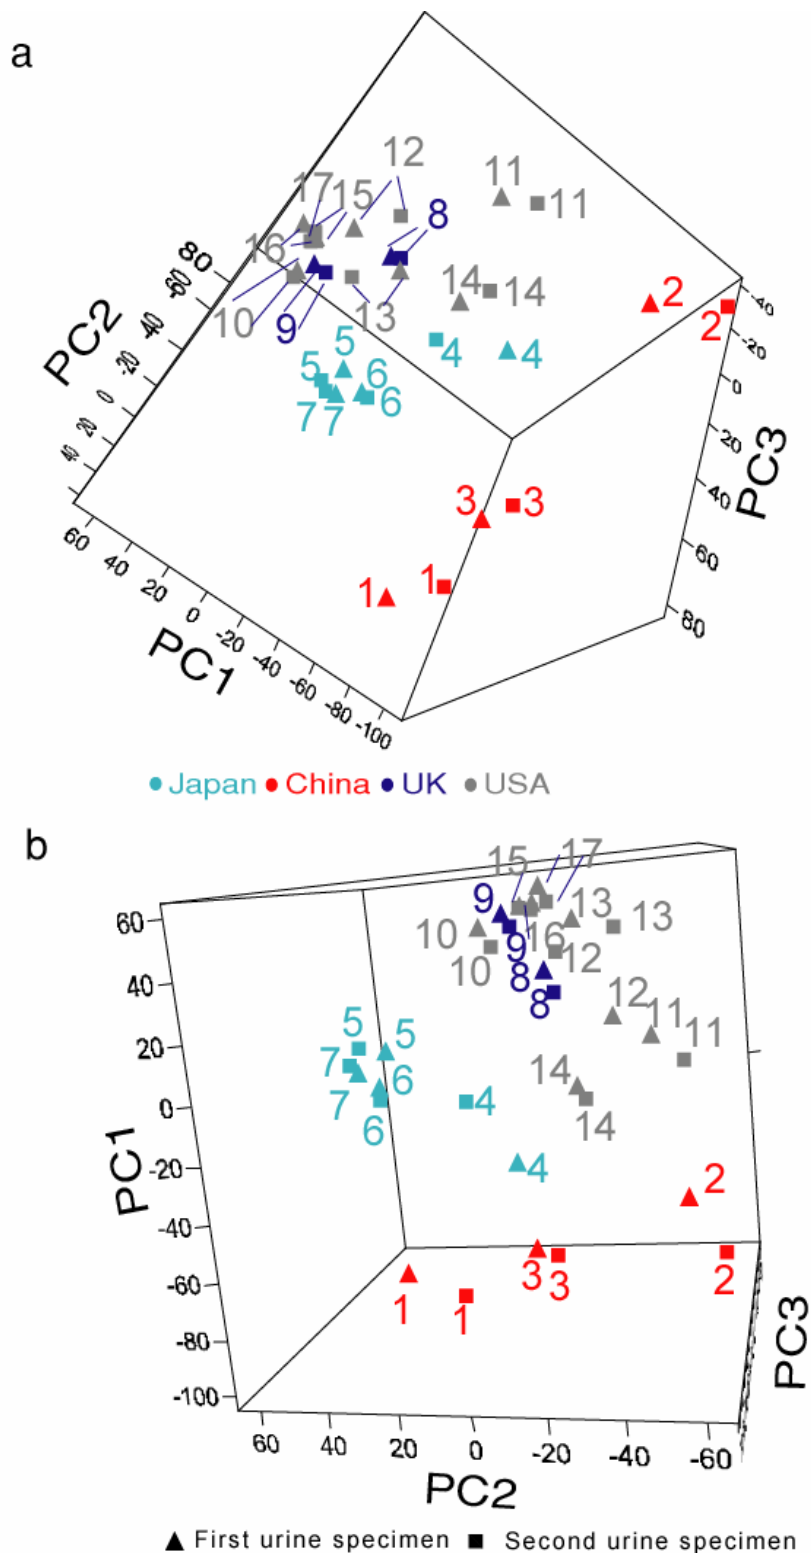

Key: 1, Beijing; 2, Guangxi; 3, Shanxi; 4, Aito Town; 5, Sapporo; 6, Toyama; 7, Wakayama; 8, Belfast; 9, West Bromwich; 10, Baltimore; 11, Chicago; 12, Corpus Christi Hispanic; 13, Corpus Christi non-Hispanic; 14, Honolulu; 15, Jackson; 16, Minneapolis; 17, Pittsburgh



**a** first ( $\blacktriangle$ ) and second ( $\blacksquare$ ) 24 h urine specimens (n= 4,630).  $R^2_{\chi}$ = 82.4% (percent variation in the NMR data explained by the model);  $Q^2_{\chi}$ = 63.1% (percent variation in the NMR data predictable by the model from cross validation), based on an 8 component model. **b** first ( $\blacktriangle$ ) and second ( $\blacksquare$ ) 24 h urine specimens ( $R^2_{\chi}$ = 70.2%,  $Q^2_{\chi}$ = 48.8%, based on a 6 component model), for normal weight<sup>†</sup>, non-diabetic participants (n= 2,063).

<sup>†</sup> Body mass index 18.50-24.99 kg/m<sup>2</sup>

**Supplementary Figure 5** PCA scores plot for individuals, first three principal components derived from the  $^1\text{H}$  NMR spectra of first urine specimens ( $n=4,630$ )

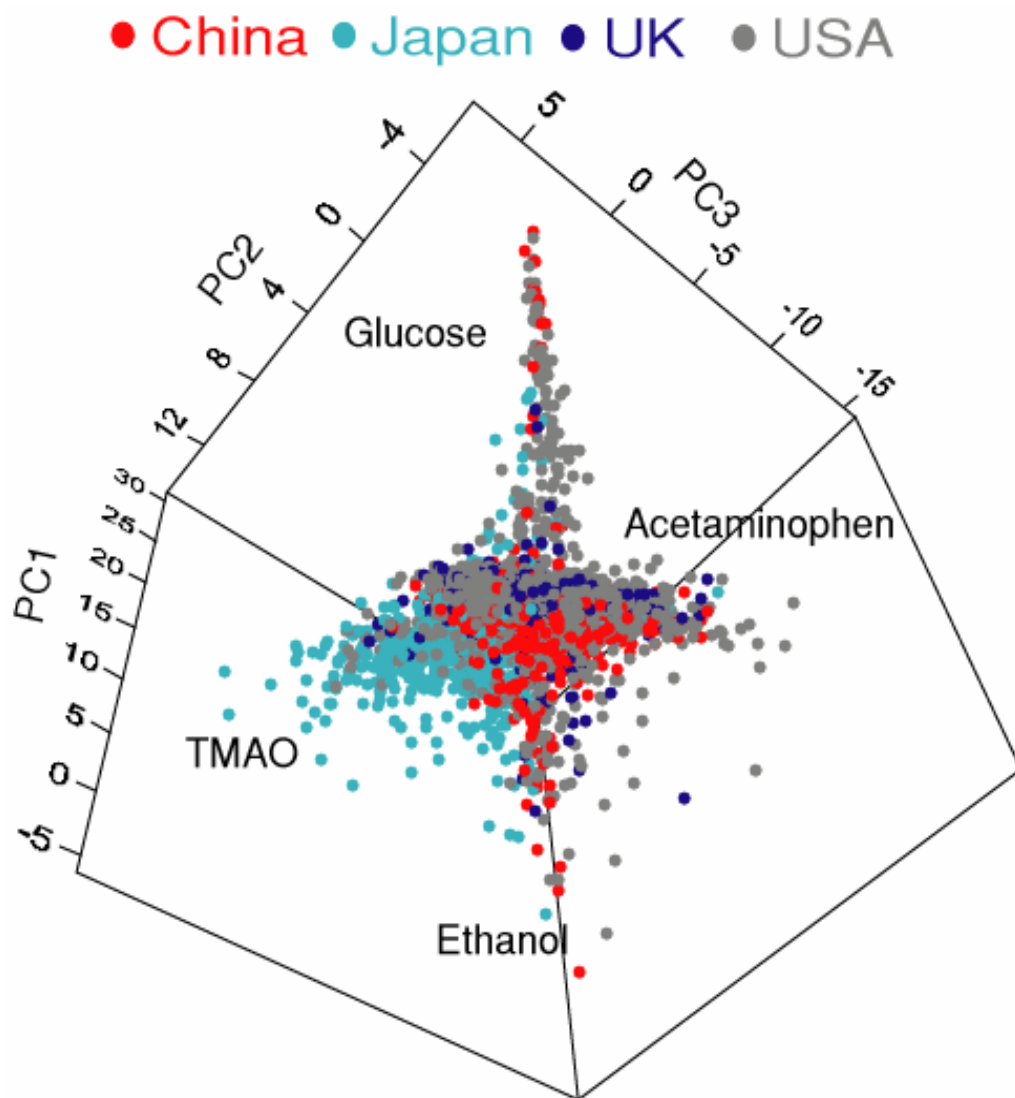

Key: PC, principal component; TMAO, trimethylamine *N*-oxide

Co-ordinates are coloured according to country of residence of participants. The plot reveals outlying groups due to high levels of urinary glucose, trimethylamine-*N*-oxide, ethanol, acetaminophen and their metabolites.  $R^2_X=80.9\%$  (percent variation in the NMR data explained by the model);  $Q^2_X=76.5\%$  (percent variation in the NMR data predictable by the model from cross validation), based on a 7 component model.

**Supplementary Figure 6** Cross validated Principal Components Analysis (PCA) scores plots based on median  $^1\text{H}$  NMR urine spectra stratified by country after the removal of outliers using 95% Hotellings  $T^2$  statistic

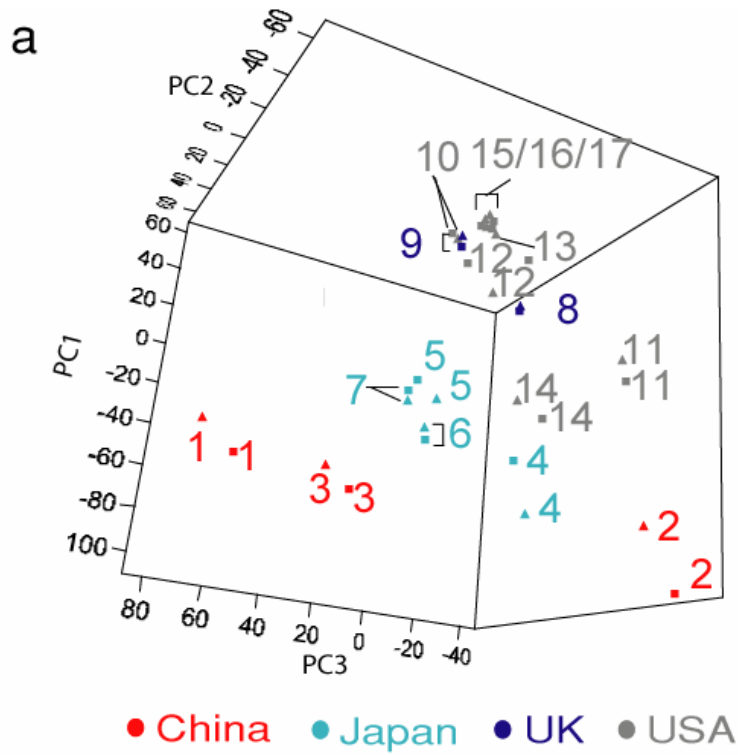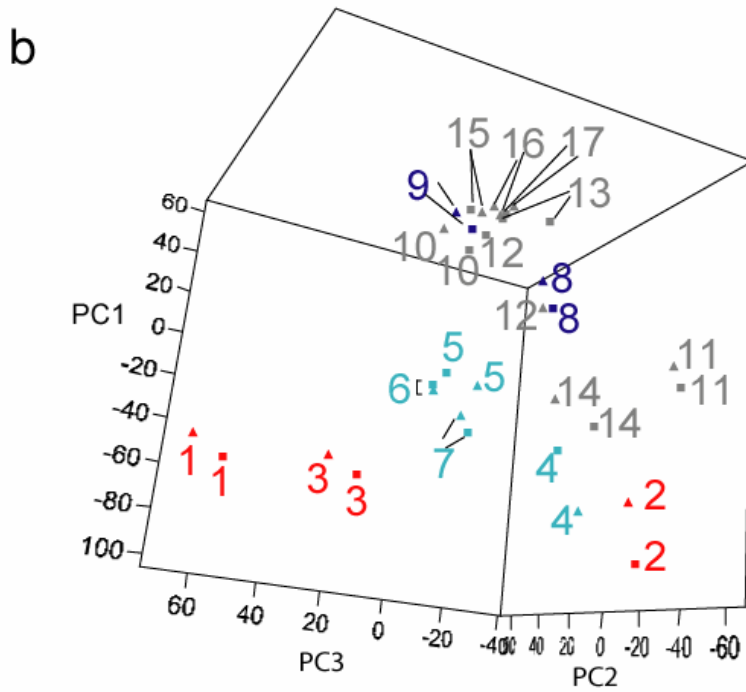

▲ First urine specimen ■ Second urine specimen

Key: 1, Beijing; 2, Guangxi; 3, Shanxi; 4, Aito Town; 5, Sapporo; 6, Toyama; 7, Wakayama; 8, Belfast; 9, West Bromwich; 10, Baltimore; 11, Chicago; 12, Corpus Christi Hispanic; 13, Corpus Christi non-Hispanic; 14, Honolulu; 15, Jackson; 16, Minneapolis; 17, Pittsburgh

**a** first ( $\blacktriangle$ ) and second ( $\blacksquare$ ) 24 h urine specimens (n= 4,055).  $R^2_X=86.1\%$  (percent variation in the NMR data explained by the model);  $Q^2_X=64.3$  (percent variation in the NMR data predictable by the model from cross validation), based on a 10 component model). **b** first ( $\blacktriangle$ ) and second ( $\blacksquare$ ) 24 h urine specimens for normal weight<sup>†</sup>, non-diabetic participants (n= 1,810,  $R^2_X= 69.4\%$ ,  $Q^2_X= 46.7\%$ , based on a 6 component model).

<sup>†</sup> Body mass index 18.50-24.99 kg/m<sup>2</sup>

**Supplementary Figure 7** O-PLS-DA scores and loadings plots (bootstrap analyses) for participants reporting high vegetable/low animal protein and low vegetable/high animal protein intakes, second 24 h urinary specimens

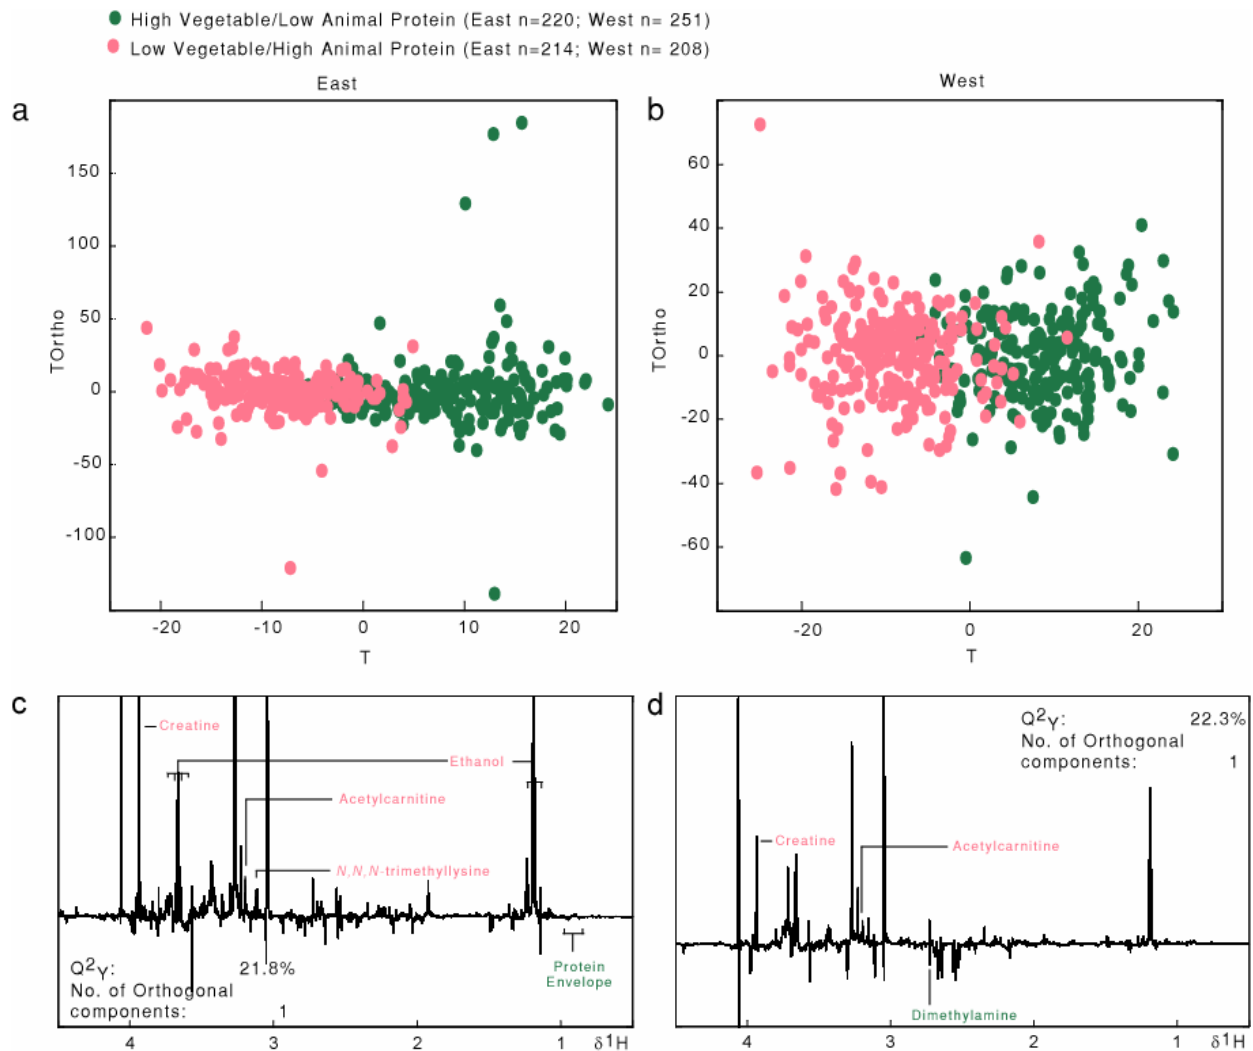

O-PLS-DA scores plots (1 orthogonal component) comparing high vegetable/low animal protein intake with low vegetable/high animal protein intake (top and bottom quartiles), adjusted for sample, age and sex, **a** eastern and **b** western population samples. Loadings plots from the O-PLS-DA bootstrap analyses are shown with discriminatory

metabolites labelled (see **Methods** for metabolite selection criteria) for **c** East Asian and **d** western participants. Analyses are after removal of metabolic outliers using the 95% Hotelling's  $T^2$  statistic in the initial PCA. The plots show the number of participants, the number of components used in each model and the  $Q^2_Y$  values (percent variation in the protein subgroup assignment explained by the model, and predictable by the model from cross validation).

**Supplementary Figure 8** Macronutrient intake (% kcal) by country (n= 4,630)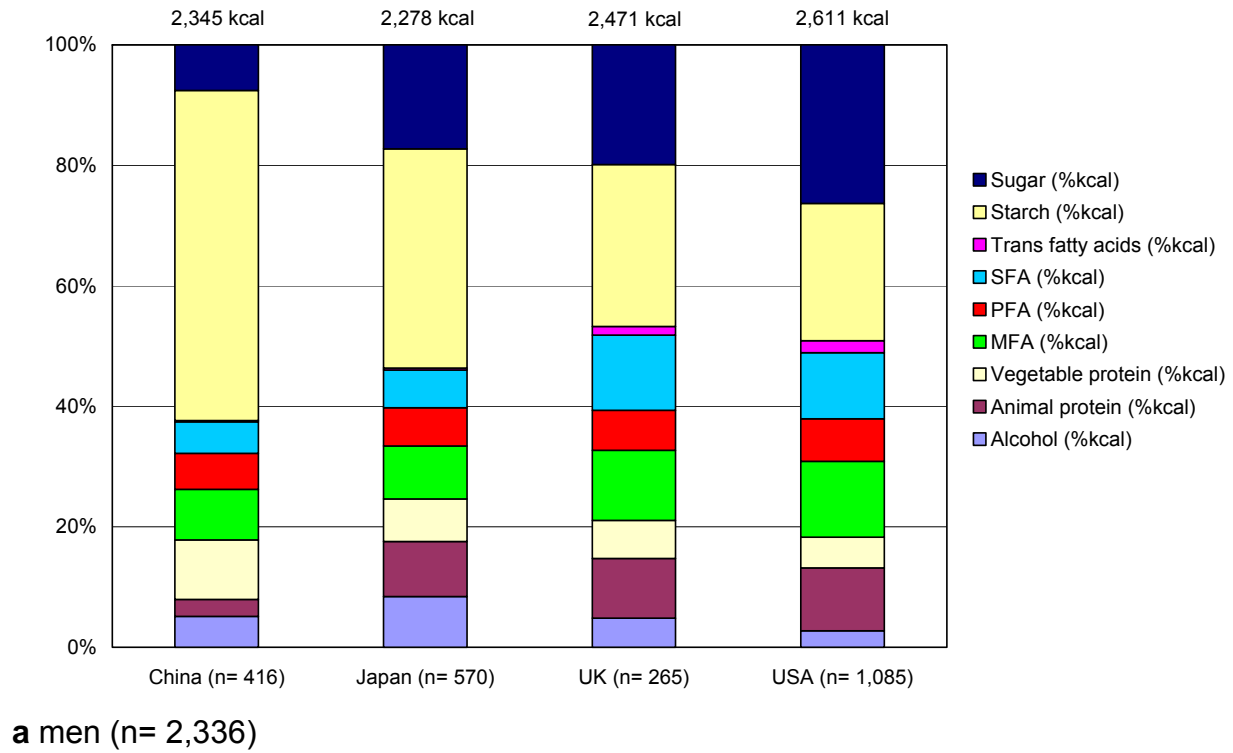



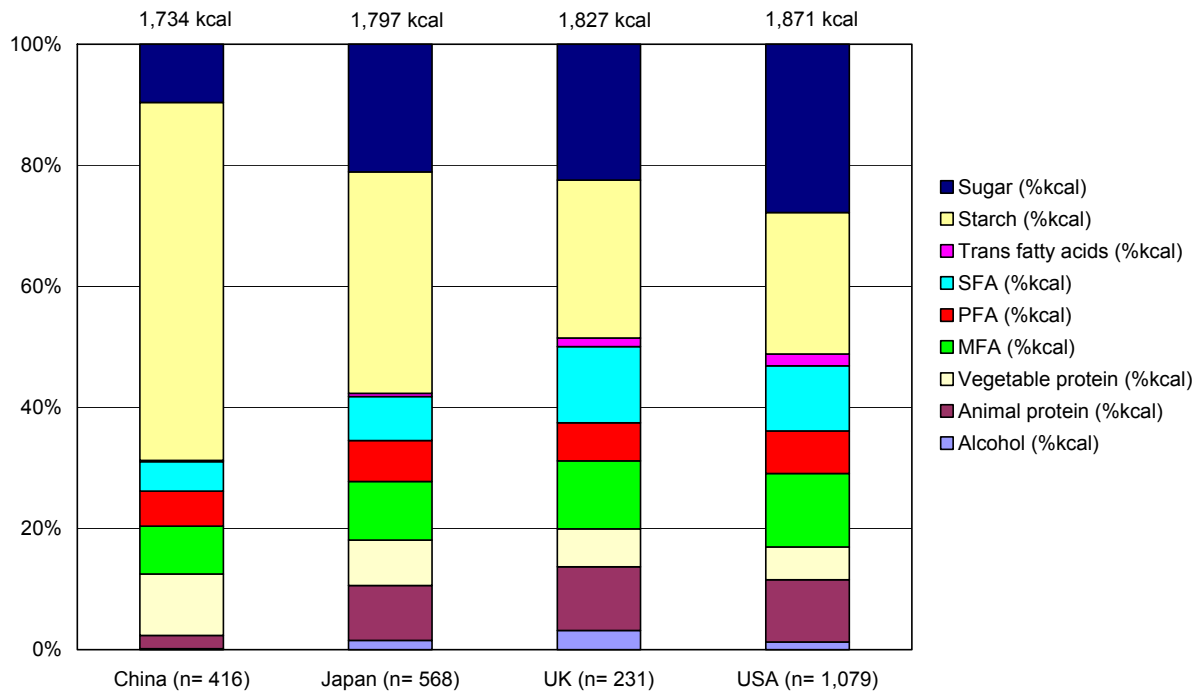

**b** women (n= 2,294)

**Supplementary Figure 9** Mean body mass index (BMI, kg/m<sup>2</sup>), dietary cholesterol (mg/1000kcal), urinary Na<sup>+</sup> excretion (mmol/24 h), urinary K<sup>+</sup> excretion (mmol/24 h) and urinary Na<sup>+</sup>/K<sup>+</sup> ratio, by country (n= 4,630)

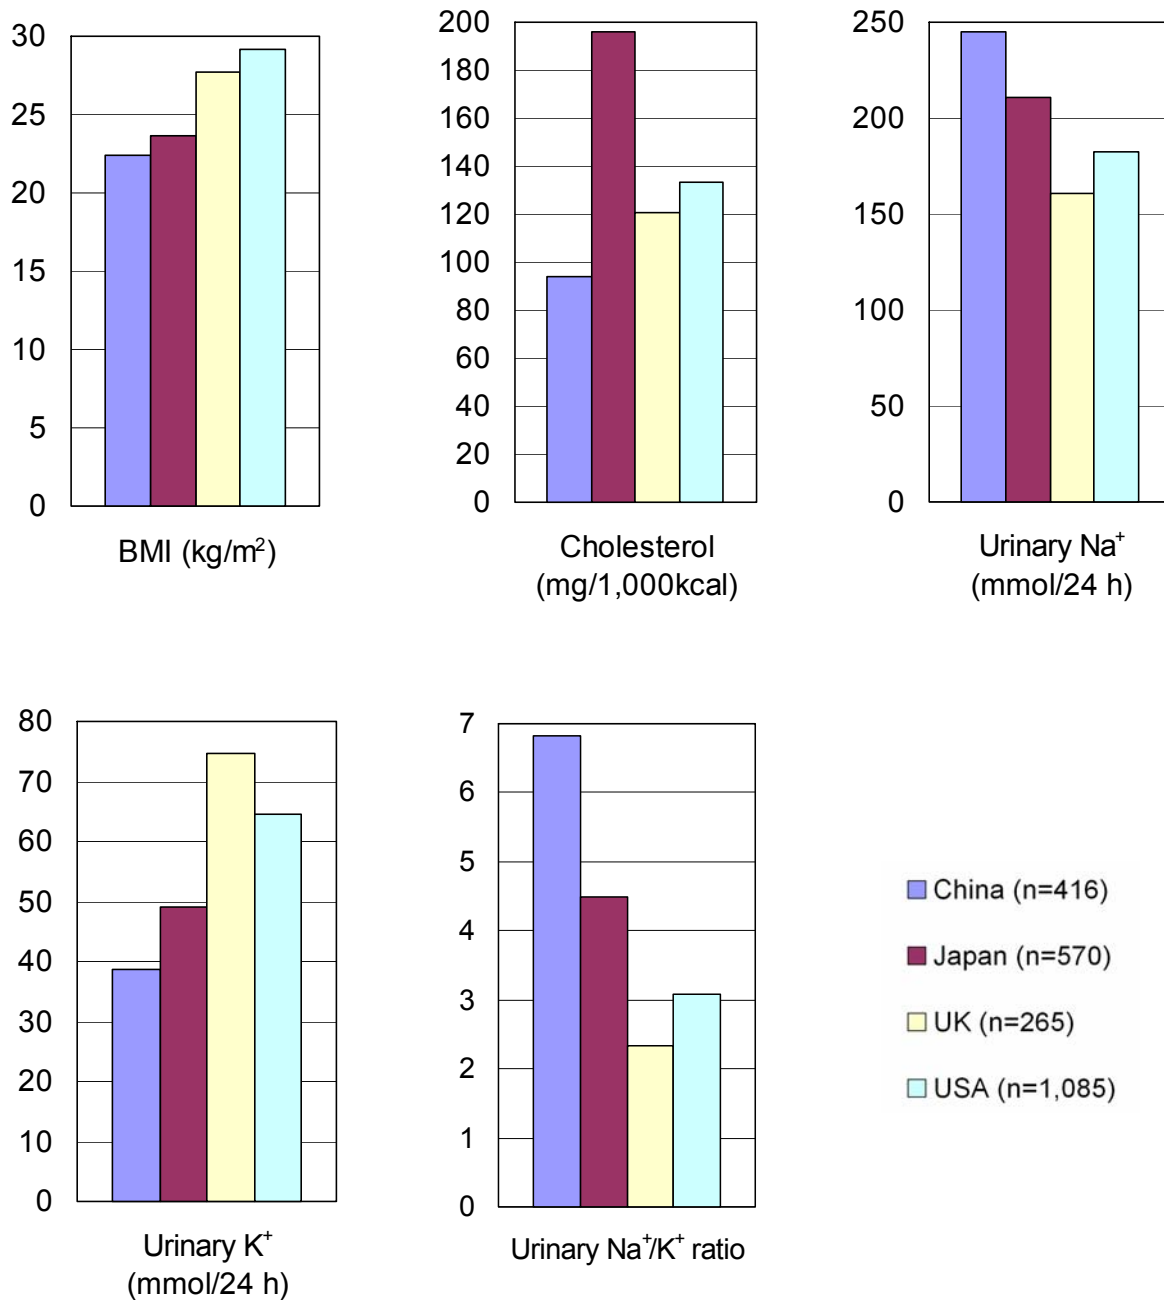

a men (n= 2,336)

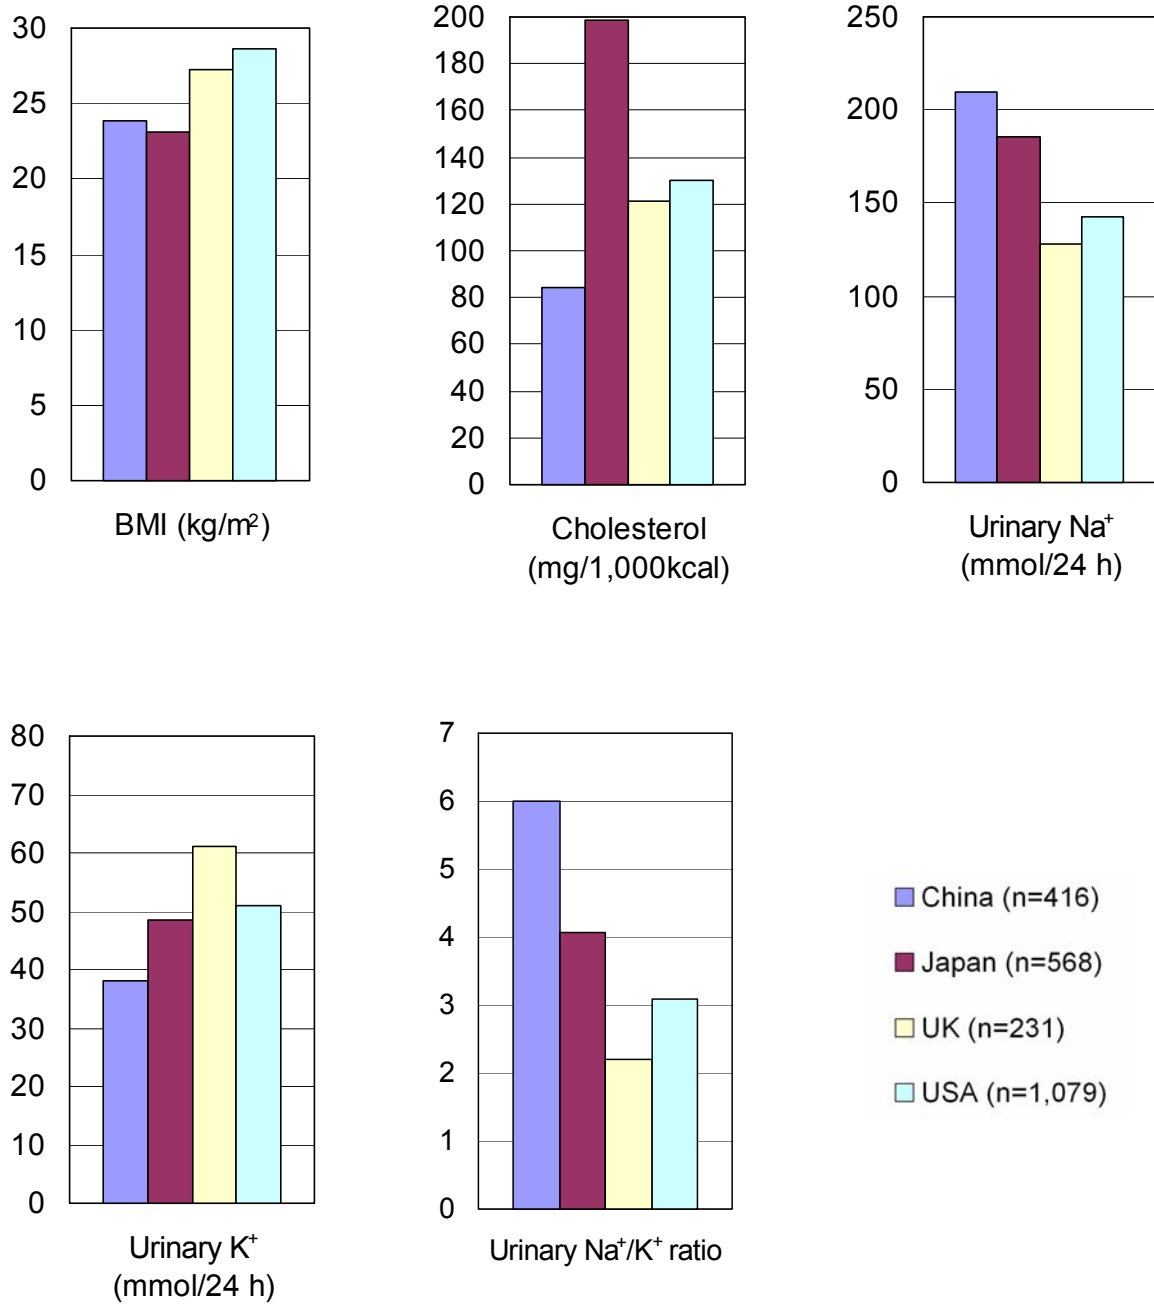

**b** women (n= 2,294)
